# Supplementary material
Source: MDPI journal article supplement (https://www.mdpi.com/2073-8994/13/9/1746)
Supplement: s1 [file s1]

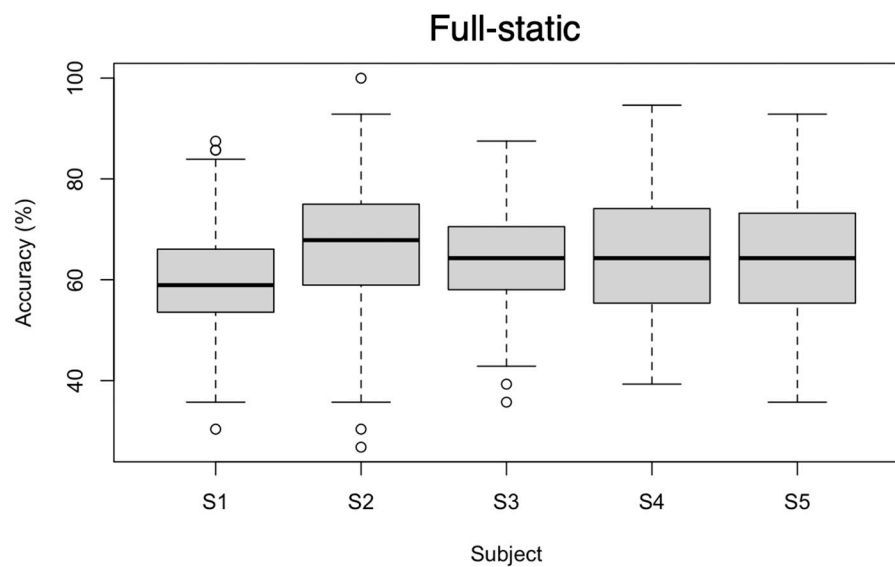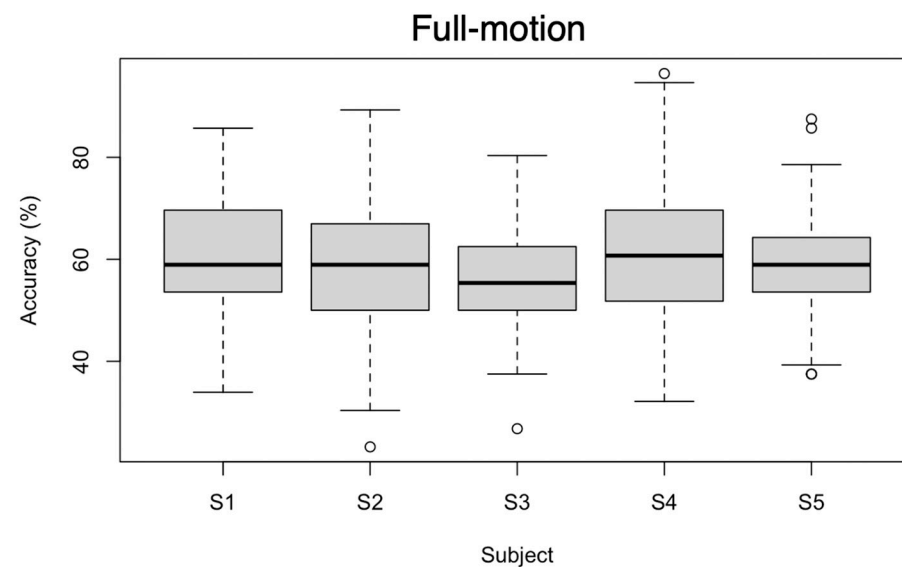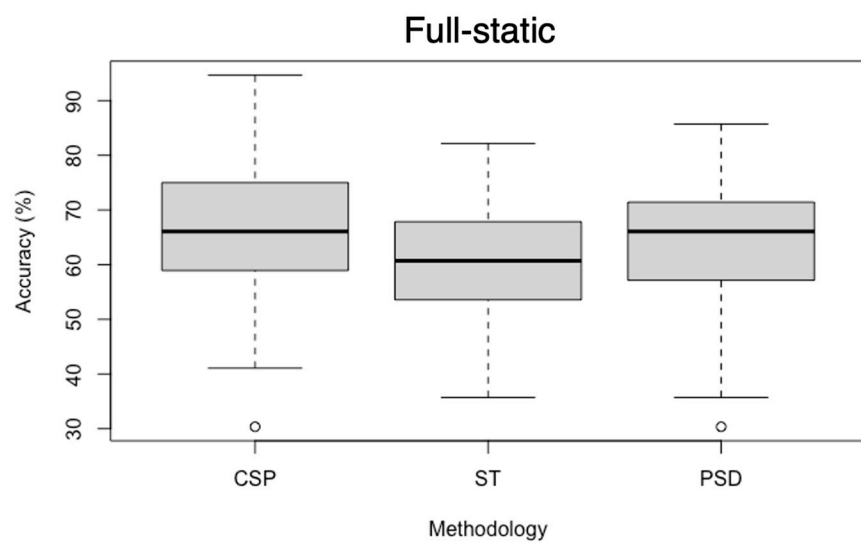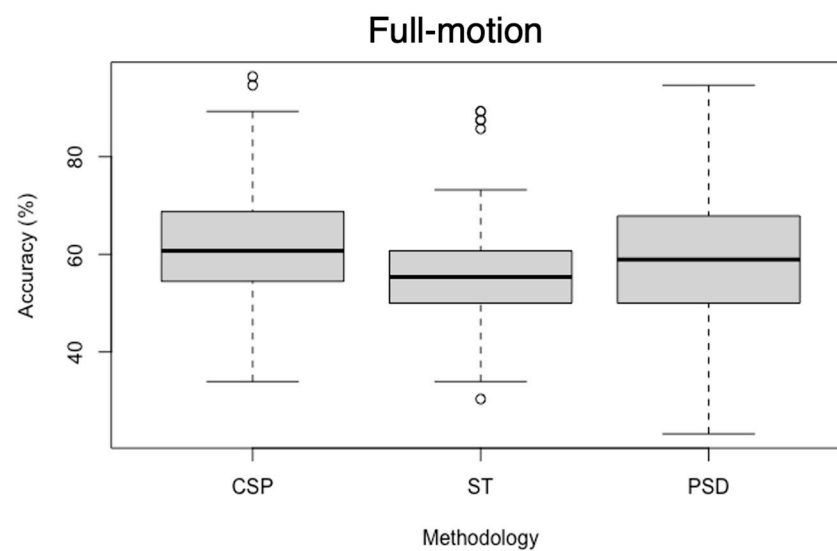

**Figure S1.** Boxplots representing the distribution of trial accuracies grouped by method and subject.
